# Supplementary material for: Harms from other people's drinking: an international survey of their occurrence, impacts on feeling safe and legislation relating to their control
Source: HighWire-hosted journal article supplement (doi:10.1136/bmjopen-2015-010112), 2015-12-01
Supplement: bmjopen-2015-010112supp.pdf [file bmjopen-2015-010112supp.pdf]

**Supplementary Table A. Respondent understanding of legislative restrictions on serving to drunks and levels of enforcement in their country of residence**

| Country                  | Is it illegal to serve drunks? |                  |       |       |         |            | Are drunks usually served? |                |                 |
|--------------------------|--------------------------------|------------------|-------|-------|---------|------------|----------------------------|----------------|-----------------|
|                          | n (all)                        | Law <sup>†</sup> | n     | Legal | Illegal | Don't know | n                          | Usually served | Usually refused |
| Germany                  | 22095                          | Yes              | 21926 | 46.76 | 8.02    | 45.22      | 21834                      | 75.88          | 24.12           |
| Sweden                   | 420                            | Yes              | 412   | 16.02 | 48.54   | 35.44      | 412                        | 60.68          | 39.32           |
| Denmark                  | 335                            | Yes              | 331   | 68.58 | 6.04    | 25.38      | 330                        | 86.67          | 13.33           |
| Poland                   | 310                            | Yes              | 306   | 8.50  | 76.80   | 14.71      | 305                        | 88.85          | 11.15           |
| UK                       | 4645                           | Yes              | 4602  | 20.14 | 41.13   | 38.72      | 4590                       | 75.62          | 24.38           |
| Ireland                  | 1856                           | Yes              | 1838  | 36.83 | 19.31   | 43.85      | 1835                       | 82.29          | 17.71           |
| Netherlands              | 4404                           | Yes              | 4370  | 19.34 | 29.02   | 51.65      | 4357                       | 74.85          | 25.15           |
| Belgium                  | 1291                           | Yes              | 1280  | 19.22 | 35.94   | 44.84      | 1274                       | 84.85          | 15.15           |
| France                   | 6220                           | Yes              | 6166  | 17.01 | 40.48   | 42.51      | 6143                       | 76.54          | 23.46           |
| Switzerland              | 3444                           | No               | 3410  | 39.82 | 9.94    | 50.23      | 3402                       | 67.11          | 32.89           |
| Austria                  | 1296                           | Yes              | 1284  | 34.89 | 25.86   | 39.25      | 1274                       | 84.62          | 15.38           |
| Hungary                  | 3277                           | Yes              | 3254  | 42.69 | 23.17   | 34.14      | 3242                       | 87.11          | 12.89           |
| Spain                    | 610                            | No               | 607   | 54.86 | 4.61    | 40.53      | 600                        | 84.17          | 15.83           |
| Portugal                 | 741                            | Yes              | 735   | 15.65 | 66.26   | 18.10      | 732                        | 83.47          | 16.53           |
| Italy                    | 256                            | Yes              | 254   | 37.40 | 22.44   | 40.16      | 254                        | 82.28          | 17.72           |
| Greece                   | 282                            | No               | 282   | 52.13 | 3.19    | 44.68      | 280                        | 94.64          | 5.36            |
| Australia                | 1798                           | Yes              | 1779  | 2.87  | 90.61   | 6.52       | 1777                       | 53.35          | 46.65           |
| New Zealand              | 1511                           | Yes              | 1505  | 1.40  | 93.89   | 4.72       | 1501                       | 46.57          | 53.43           |
| Canada                   | 921                            | Yes              | 912   | 16.56 | 42.65   | 40.79      | 910                        | 63.19          | 36.81           |
| USA                      | 4118                           | Yes <sup>‡</sup> | 4065  | 17.86 | 32.77   | 49.37      | 4043                       | 63.52          | 36.48           |
| Brazil                   | 3895                           | Yes              | 3863  | 76.34 | 1.29    | 22.37      | 3858                       | 92.53          | 7.47            |
| $X^2$                    |                                |                  |       |       |         | 20228.391  |                            |                | 2922.834        |
| P                        |                                |                  |       |       |         | <0.001     |                            |                | <0.001          |
| All illegal <sup>§</sup> | 59389                          | Yes              | 58882 | 34.41 | 25.66   | 39.93      | 58671                      | 75.82          | 24.18           |
| All legal <sup>§</sup>   | 4336                           | No               | 4299  | 42.75 | 8.75    | 48.50      | 4282                       | 71.30          | 28.70           |
| $X^2$                    |                                |                  |       |       |         | 620.181    |                            |                | 44.040          |
| P                        |                                |                  |       |       |         | <0.001     |                            |                | <0.001          |
| Total                    | 63725                          |                  | 63181 | 34.98 | 24.51   | 40.51      | 62953                      | 75.51          | 24.49           |

<sup>†</sup>Whether it is against the law to serve to inebriated individuals is taken from Global Status Report on Alcohol and Health (WHO 2014) <sup>‡</sup>Only Florida and Nevada have no such laws at the State level (Laws Prohibiting Alcohol Sales to Intoxicated Persons, 2009). <sup>§</sup>Sum of all individuals from countries where there are legal restrictions on selling to drunk individuals and all individuals where there are no restrictions.

**Supplementary Table B. Adjusted Odds Ratios (AORs) at country of residence level for different harms suffered as a result of others' drinking in last 12 months<sup>†</sup>**

| Country            | Aggressive harms from others' drinking |                                |                     |                     |                     |                   |                     |     | Other harm from others' drinking |                  |                     |                |                     |     |                     |     | All harms           |     |                     |     |
|--------------------|----------------------------------------|--------------------------------|---------------------|---------------------|---------------------|-------------------|---------------------|-----|----------------------------------|------------------|---------------------|----------------|---------------------|-----|---------------------|-----|---------------------|-----|---------------------|-----|
|                    | Physically assaulted                   | Sexually harassed or assaulted | Verbally insulted   | Any aggressive harm |                     | Unintended injury | Traffic incident    |     | Kept awake                       | Property damaged |                     | Any other harm |                     | AOR | P                   |     |                     |     |                     |     |
|                    | AOR (95% CIs)                          | P                              | AOR (95% CIs)       | P                   | AOR (95% CIs)       | P                 | AOR (95% CIs)       | P   | AOR (95% CIs)                    | P                | AOR (95% CIs)       | P              | AOR (95% CIs)       | P   | AOR (95% CIs)       | P   |                     |     |                     |     |
| <b>Sweden</b>      | 1.27<br>(0.90-1.81)                    | ns                             | 1.19<br>(0.78-1.79) | ns                  | 0.77<br>(0.62-0.96) | *                 | 0.84<br>(0.68-1.04) | ns  | 1.04<br>(0.69-1.57)              | ns               | 0.70<br>(0.17-2.84) | ns             | 1.35<br>(1.07-1.70) | *   | 1.31<br>(0.97-1.76) | ns  | 1.20<br>(0.97-1.49) | ns  | 0.93<br>(0.75-1.15) | ns  |
| <b>Denmark</b>     | 0.86<br>(0.57-1.30)                    | ns                             | 1.53<br>(1.02-2.29) | *                   | 0.47<br>(0.36-0.60) | ***               | 0.57<br>(0.45-0.72) | *** | 0.91<br>(0.58-1.42)              | ns               | 1.14<br>(0.36-3.61) | ns             | 2.30<br>(1.82-2.91) | *** | 1.13<br>(0.81-1.58) | ns  | 1.75<br>(1.39-2.21) | *** | 1.00<br>(0.79-1.27) | ns  |
| <b>Poland</b>      | 0.93<br>(0.62-1.40)                    | ns                             | 0.78<br>(0.48-1.29) | ns                  | 0.66<br>(0.52-0.84) | **                | 0.67<br>(0.52-0.85) | **  | 1.18<br>(0.79-1.76)              | ns               | NC<br>NC            | NC             | 1.72<br>(1.34-2.02) | *** | 1.38<br>(1.00-1.88) | *   | 1.55<br>(1.22-1.96) | *** | 0.99<br>(0.77-1.26) | ns  |
| <b>UK</b>          | 0.93<br>(0.83-1.05)                    | ns                             | 1.48<br>(1.32-1.65) | ***                 | 0.90<br>(0.84-0.96) | **                | 0.96<br>(0.90-1.03) | ns  | 1.29<br>(1.15-1.44)              | ***              | 0.87<br>(0.59-1.28) | ns             | 3.30<br>(3.08-3.53) | *** | 1.24<br>(1.13-1.63) | *** | 2.42<br>(2.26-2.59) | *** | 1.55<br>(1.44-1.67) | *** |
| <b>Ireland</b>     | 1.13<br>(0.97-1.33)                    | ns                             | 0.95<br>(0.81-1.12) | ns                  | 0.97<br>(0.87-1.07) | ns                | 1.02<br>(0.92-1.13) | ns  | 1.68<br>(1.46-1.94)              | ***              | 0.71<br>(0.40-1.27) | ns             | 2.81<br>(2.54-3.11) | *** | 1.43<br>(1.26-1.62) | *** | 2.19<br>(1.98-2.42) | *** | 1.47<br>(1.31-1.65) | *** |
| <b>Netherlands</b> | 0.84<br>(0.74-0.93)                    | **                             | 1.12<br>(1.00-1.26) | ns                  | 0.66<br>(0.62-0.71) | ***               | 0.72<br>(0.67-0.78) | *** | 0.98<br>(0.87-1.11)              | ns               | 1.43<br>(1.03-1.98) | *              | 1.63<br>(1.52-1.76) | *** | 1.02<br>(0.92-1.13) | ns  | 1.38<br>(1.29-1.48) | *** | 0.95<br>(0.88-1.02) | ns  |
| <b>Belgium</b>     | 1.17<br>(0.96-1.43)                    | ns                             | 0.96<br>(0.76-1.20) | ns                  | 0.64<br>(0.56-0.72) | ***               | 0.70<br>(0.62-0.79) | *** | 0.89<br>(0.71-1.12)              | ns               | 1.92<br>(1.18-3.11) | **             | 1.57<br>(1.39-1.78) | *** | 1.28<br>(1.08-1.15) | **  | 1.47<br>(1.31-1.66) | *** | 0.99<br>(0.88-1.11) | ns  |
| <b>France</b>      | 1.02<br>(0.92-1.13)                    | ns                             | 0.32<br>(0.28-0.38) | ***                 | 0.99<br>(0.93-1.05) | ns                | 0.91<br>(0.86-0.97) | **  | 0.84<br>(0.75-0.95)              | **               | 1.81<br>(1.37-2.38) | ***            | 1.01<br>(0.94-1.08) | ns  | 1.20<br>(1.10-1.31) | *** | 1.07<br>(1.01-1.14) | *   | 1.04<br>(0.98-1.10) | ns  |
| <b>Switzerland</b> | 0.89<br>(0.76-1.03)                    | ns                             | 0.55<br>(0.46-0.66) | ***                 | 0.77<br>(0.71-0.83) | ***               | 0.76<br>(0.70-0.82) | *** | 0.54<br>(0.44-0.65)              | ***              | 1.08<br>(0.70-1.66) | ns             | 0.60<br>(0.54-0.66) | *** | 0.64<br>(0.55-0.74) | *** | 0.62<br>(0.57-0.68) | *** | 0.70<br>(0.65-0.75) | *** |
| <b>Austria</b>     | 1.31<br>(1.07-1.61)                    | *                              | 1.42<br>(1.17-1.73) | ***                 | 0.99<br>(0.88-1.12) | ns                | 1.09<br>(0.97-1.22) | ns  | 0.82<br>(0.64-1.06)              | ns               | 0.24<br>(0.06-0.97) | *              | 0.84<br>(0.73-0.97) | *   | 0.86<br>(0.71-1.05) | ns  | 0.80<br>(0.70-0.91) | **  | 1.04<br>(0.93-1.18) | ns  |
| <b>Hungary</b>     | 0.45<br>(0.37-0.54)                    | ***                            | 0.31<br>(0.24-0.39) | ***                 | 0.46<br>(0.42-0.50) | ***               | 0.45<br>(0.41-0.49) | *** | 1.14<br>(0.99-1.32)              | ns               | 1.10<br>(0.72-1.68) | ns             | 1.10<br>(1.01-1.20) | *   | 0.55<br>(0.48-0.64) | *** | 1.01<br>(0.93-1.09) | ns  | 0.65<br>(0.60-0.70) | *** |
| <b>Spain</b>       | 0.87<br>(0.62-1.21)                    | ns                             | 0.92<br>(0.65-1.29) | ns                  | 0.46<br>(0.38-0.56) | ***               | 0.51<br>(0.43-0.62) | *** | 0.95<br>(0.68-1.34)              | ns               | 1.73<br>(0.80-3.72) | ns             | 1.28<br>(1.06-1.55) | *   | 0.71<br>(0.52-0.96) | *   | 1.14<br>(0.95-1.35) | ns  | 0.69<br>(0.58-0.82) | *** |
| <b>Portugal</b>    | 0.44<br>(0.28-0.69)                    | ***                            | 0.17<br>(0.09-0.32) | ***                 | 0.45<br>(0.38-0.54) | ***               | 0.43<br>(0.36-0.51) | *** | 0.67<br>(0.45-0.99)              | *                | 0.71<br>(0.23-2.24) | ns             | 0.70<br>(0.57-0.85) | *** | 0.48<br>(0.34-0.68) | *** | 0.62<br>(0.52-0.74) | *** | 0.47<br>(0.40-0.55) | *** |

|                    |                     |     |                     |     |                     |     |                     |     |                     |     |                     |     |                     |     |                     |     |                     |     |                     |     |
|--------------------|---------------------|-----|---------------------|-----|---------------------|-----|---------------------|-----|---------------------|-----|---------------------|-----|---------------------|-----|---------------------|-----|---------------------|-----|---------------------|-----|
| <b>Italy</b>       | 1.01<br>(0.62-1.65) | ns  | 1.38<br>(0.88-2.17) | ns  | 0.76<br>(0.58-0.99) | *   | 0.83<br>(0.64-1.08) | ns  | 0.73<br>(0.40-1.32) | ns  | 1.16<br>(0.29-4.74) | ns  | 0.95<br>(0.70-1.29) | ns  | 0.60<br>(0.37-0.99) | *   | 0.87<br>(0.66-1.15) | ns  | 0.91<br>(0.70-1.18) | ns  |
| <b>Greece</b>      | 0.24<br>(0.10-0.59) | **  | 0.32<br>(0.13-0.79) | *   | 0.28<br>(0.20-0.39) | *** | 0.27<br>(0.20-0.37) | *** | 0.57<br>(0.29-1.11) | ns  | 3.66<br>(1.60-8.39) | **  | 0.46<br>(0.31-0.68) | *** | 0.26<br>(0.13-0.53) | *** | 0.49<br>(0.36-0.67) | *** | 0.34<br>(0.26-0.45) | *** |
| <b>Australia</b>   | 0.97<br>(0.80-1.16) | ns  | 1.35<br>(1.14-1.60) | **  | 0.86<br>(0.78-0.95) | **  | 0.88<br>(0.80-0.98) | *   | 1.45<br>(1.23-1.72) | *** | 0.88<br>(0.49-1.60) | ns  | 2.77<br>(2.50-3.06) | *** | 1.24<br>(1.08-1.44) | **  | 2.14<br>(1.93-2.36) | *** | 1.34<br>(1.21-1.49) | *** |
| <b>New Zealand</b> | 0.92<br>(0.74-1.14) | ns  | 0.85<br>(0.70-1.04) | ns  | 0.97<br>(0.87-1.09) | ns  | 0.93<br>(0.84-1.04) | ns  | 1.50<br>(1.25-1.79) | *** | 1.26<br>(0.73-2.20) | ns  | 4.64<br>(4.16-5.18) | *** | 2.60<br>(2.28-2.96) | *** | 3.66<br>(3.27-4.10) | *** | 2.07<br>(1.83-2.35) | *** |
| <b>Canada</b>      | 1.09<br>(0.84-1.41) | ns  | 1.03<br>(0.83-1.27) | ns  | 0.92<br>(0.80-1.06) | ns  | 0.90<br>(0.78-1.04) | ns  | 1.20<br>(0.96-1.51) | ns  | 0.90<br>(0.40-2.05) | ns  | 2.34<br>(2.03-2.69) | *** | 1.14<br>(0.93-1.40) | ns  | 1.79<br>(1.55-2.05) | *** | 1.27<br>(1.10-1.48) | **  |
| <b>USA</b>         | 0.90<br>(0.78-1.04) | ns  | 1.19<br>(1.07-1.33) | **  | 0.85<br>(0.79-0.92) | *** | 0.88<br>(0.82-0.95) | **  | 1.21<br>(1.07-1.36) | **  | 1.38<br>(0.97-1.97) | ns  | 2.39<br>(2.22-2.57) | *** | 1.48<br>(1.34-1.63) | *** | 1.93<br>(1.80-2.08) | *** | 1.23<br>(1.14-1.32) | *** |
| <b>Brazil</b>      | 0.46<br>(0.39-0.55) | *** | 0.25<br>(0.21-0.31) | *** | 0.57<br>(0.53-0.62) | *** | 0.52<br>(0.48-0.56) | *** | 0.97<br>(0.85-1.11) | ns  | 2.20<br>(1.62-2.98) | *** | 0.88<br>(0.81-0.96) | **  | 0.47<br>(0.41-0.54) | *** | 0.79<br>(0.73-0.76) | *** | 0.57<br>(0.53-0.61) | *** |

†Age, sex, AUDIT score and educational attainment were also included in the logistic regression model and those Adjusted Odds Ratios (AORs) are shown in Table 3. Reference category=Germany. NC=Insufficient traffic incidents were reported from the Poland sample to calculate AORs for Poland. For P values, \*\*\*P<0.001, \*\*P<0.01, \*P<0.05, ns = not significant.

**Supplementary Table C. Adjusted Odds Ratios (AORs) at country of residence level for feeling unsafe/very unsafe<sup>†</sup> at different times during a night out**

| Country            | On way out             |     | In bars             |     | In clubs            |     | On way home         |     |
|--------------------|------------------------|-----|---------------------|-----|---------------------|-----|---------------------|-----|
|                    | AOR<br>(95% CIs)       | P   | AOR<br>(95% CIs)    | P   | AOR<br>(95% CIs)    | P   | AOR<br>(95% CIs)    | P   |
| <b>Sweden</b>      | 0.97<br>(0.57-1.67)    | ns  | 1.26<br>(0.79-2.02) | ns  | 0.97<br>(0.71-1.34) | ns  | 0.90<br>(0.68-1.19) | ns  |
| <b>Denmark</b>     | 1.35<br>(0.80-2.28)    | ns  | 1.43<br>(0.86-2.39) | ns  | 0.71<br>(0.47-1.06) | ns  | 0.50<br>(0.34-0.72) | *** |
| <b>Poland</b>      | 3.21<br>(2.19-4.71)    | *** | 2.32<br>(1.49-3.61) | *** | 2.53<br>(1.92-3.34) | *** | 2.05<br>(1.58-2.65) | *** |
| <b>UK</b>          | 1.29<br>(1.11-1.51)    | **  | 0.89<br>(0.74-1.07) | ns  | 1.17<br>(1.06-1.28) | **  | 1.69<br>(1.57-1.82) | *** |
| <b>Ireland</b>     | 1.29<br>(1.03-1.60)    | *   | 1.02<br>(0.79-1.33) | ns  | 0.81<br>(0.69-0.95) | *   | 1.60<br>(1.43-1.79) | *** |
| <b>Netherlands</b> | 0.98<br>(0.83-1.16)    | ns  | 0.46<br>(0.36-0.58) | *** | 0.44<br>(0.38-0.50) | *** | 0.80<br>(0.73-0.87) | *** |
| <b>Belgium</b>     | 1.19<br>(0.90-1.57)    | ns  | 0.77<br>(0.55-1.08) | ns  | 1.12<br>(0.94-1.33) | ns  | 1.28<br>(1.12-1.48) | *** |
| <b>France</b>      | 2.40<br>(2.13-2.69)    | *** | 1.15<br>(0.99-1.34) | ns  | 1.37<br>(1.26-1.49) | *** | 2.33<br>(2.18-2.49) | *** |
| <b>Switzerland</b> | 1.12<br>(0.94-1.34)    | ns  | 0.73<br>(0.60-0.89) | **  | 0.86<br>(0.76-0.97) | *   | 0.95<br>(0.86-1.04) | ns  |
| <b>Austria</b>     | 0.83<br>(0.61-1.14)    | ns  | 0.72<br>(0.51-1.01) | ns  | 0.75<br>(0.62-0.91) | **  | 0.65<br>(0.55-0.76) | *** |
| <b>Hungary</b>     | 1.44<br>(1.21-1.72)    | *** | 0.76<br>(0.61-0.96) | *   | 1.43<br>(1.28-1.59) | *** | 1.83<br>(1.68-2.00) | *** |
| <b>Spain</b>       | 1.51<br>(1.05-2.18)    | *   | 0.90<br>(0.57-1.42) | ns  | 1.21<br>(0.95-1.54) | ns  | 0.93<br>(0.75-1.17) | ns  |
| <b>Portugal</b>    | 1.95<br>(1.45-2.63)    | *** | 1.22<br>(0.85-1.74) | ns  | 1.07<br>(0.85-1.34) | ns  | 2.04<br>(1.72-2.41) | *** |
| <b>Italy</b>       | 2.19<br>(1.36-3.52)    | **  | 0.76<br>(0.36-1.62) | ns  | 1.24<br>(0.85-1.80) | ns  | 1.33<br>(0.98-1.81) | ns  |
| <b>Greece</b>      | 4.50<br>(3.13-6.49)    | *** | 2.01<br>(1.24-3.27) | **  | 1.57<br>(1.13-2.19) | **  | 2.67<br>(2.05-3.49) | *** |
| <b>Australia</b>   | 1.58<br>(1.28-1.94)    | *** | 1.49<br>(1.19-1.85) | *** | 1.79<br>(1.57-2.03) | *** | 1.80<br>(1.61-2.01) | *** |
| <b>New Zealand</b> | 1.36<br>(1.08-1.72)    | **  | 1.34<br>(1.05-1.70) | *   | 1.10<br>(0.94-1.29) | ns  | 1.43<br>(1.26-1.62) | *** |
| <b>Canada</b>      | 0.65<br>(0.45-0.96)    | *   | 0.94<br>(0.67-1.32) | ns  | 1.05<br>(0.86-1.28) | ns  | 0.72<br>(0.61-0.85) | *** |
| <b>USA</b>         | 1.24<br>(1.06-1.44)    | **  | 1.56<br>(1.34-1.81) | *** | 1.79<br>(1.62-1.92) | *** | 1.20<br>(1.10-1.30) | *** |
| <b>Brazil</b>      | 11.70<br>(10.58-12.95) | *** | 5.92<br>(5.29-6.62) | *** | 2.36<br>(2.16-2.58) | *** | 8.52<br>(7.86-9.24) | *** |

<sup>†</sup>Feelings of safety were measured on a 1 (very unsafe) to 5 (very safe) Likert scale with individuals categorised as feeling unsafe/very unsafe (score 1 or 2) or safer (score 3-5). Age, sex, AUDIT score and educational attainment were also included in the logistic regression model and those Adjusted Odds Ratios (AORs) are shown in Table 5. Reference category=Germany. For P values, \*\*\*P<0.001, \*\*P<0.01, \*P<0.05, ns = not significant.
